# Supplementary material
Source: MDPI journal article supplement (https://www.mdpi.com/2071-1050/13/24/13841)
Supplement: s1 [file s1]

## Supplementary Information

### Tables

**Table S1.** The weights of total fish landing at Jeju fishing harbors from January to December 2018

|               | Mackerel  | Hairtail | Small Yellow Croaker | Anchovy | Red Tilefish | Red-banded Lobster | Brown Croaker |
|---------------|-----------|----------|----------------------|---------|--------------|--------------------|---------------|
| Purse Seine   | 2,703,193 | 15,844   | 0                    | 1,763   | 0            | 0                  | 28            |
| Longline      | 8,405     | 630,236  | 133                  | 14,465  | 7,114        | 0                  | 1,955         |
| Gill Net      | 47,016    | 95,295   | 612,017              | 11,502  | 29,513       | 0                  | 20,716        |
| Squid Jigging | 10,198    | 102,726  | 374                  | 28,501  | 4,553        | 0                  | 2,793         |
| Trawl         | 32        | 1,398    | 3,791                | 0       | 6,724        | 231,488            | 25,354        |

(unit: kg)

**Table S2.** Fish landing data at for the waters surrounding Jeju Island

| Sale date  | Seller location        | Fish species         | Fish state   | Fishing vessel type | Weight (kg) |
|------------|------------------------|----------------------|--------------|---------------------|-------------|
| 2019-09-01 | Jeju fishery union     | Hairtail             | Refrigerated | Squid Jigging       | 92          |
| 2019-09-01 | Jeju fishery union     | Hairtail             | Refrigerated | Squid Jigging       | 12          |
| 2019-09-01 | Jeju fishery union     | Hairtail             | Refrigerated | Small Purse Seine   | 20          |
| 2019-09-01 | Jeju fishery union     | Hairtail             | Refrigerated | Longline            | 50          |
| 2019-09-01 | Jeju fishery union     | Squid                | Refrigerated | Small Purse Seine   | 400         |
| 2019-09-01 | Jeju fishery union     | Small Yellow Croaker | Refrigerated | Gill Net            | 195         |
| 2019-09-01 | Jeju fishery union     | Small Yellow Croaker | Refrigerated | Gill Net            | 60          |
| 2019-09-01 | Hanlim fishery union   | Red Tilefish         | Alive        | Squid Jigging       | 10          |
| 2019-09-01 | Hanlim fishery union   | Red Tilefish         | Alive        | Squid Jigging       | 10          |
| 2019-09-01 | Hanlim fishery union   | Mackerel             | Refrigerated | Gill Net            | 1,120       |
| 2019-09-01 | Hanlim fishery union   | Mackerel             | Refrigerated | Longline            | 10          |
| 2019-09-01 | Hanlim fishery union   | Mackerel             | Refrigerated | Squid Jigging       | 50          |
| 2019-09-02 | Seoguipo fishery union | Sea eel              | Alive        | Squid Jigging       | 10          |
| 2019-09-02 | Seoguipo fishery union | Red Tilefish         | Refrigerated | Squid Jigging       | 19          |



|            |                        |              |              |               |    |
|------------|------------------------|--------------|--------------|---------------|----|
| 2019-09-02 | Seoguipo fishery union | Red Tilefish | Refrigerated | Squid Jigging | 4  |
| 2019-09-02 | Seoguipo fishery union | Red Tilefish | Refrigerated | Gill Net      | 72 |
| 2019-09-02 | Seoguipo fishery union | Red Tilefish | Refrigerated | Gill Net      | 13 |

**Table S3.** Example showing analysis results of allocating fishing status to a vessel during a fishing trip

| Fishing Status                   | Start Time       | End Time         | Hairtail | Brown Croaker | Mackere l |
|----------------------------------|------------------|------------------|----------|---------------|-----------|
| At Fishing Harbor (Fish Landing) | 2018-01-01 00:00 | 2018-01-05 16:25 | 112      | 5             | 32        |
| Navigation                       | 2018-01-05 16:25 | 2018-01-05 19:00 |          |               |           |
| 1st Fishing Activity             | 2018-01-05 19:00 | 2018-01-06 07:00 |          |               |           |
| Non-fishing Activity             | 2018-01-06 07:00 | 2018-01-07 19:00 |          |               |           |
| 2nd Fishing Activity             | 2018-01-07 19:00 | 2018-01-08 07:00 |          |               |           |
| Non-fishing Activity             | 2018-01-08 07:00 | 2018-01-07 19:00 |          |               |           |
| 3rd Fishing Activity             | 2018-01-07 19:00 | 2018-01-06 07:00 |          |               |           |
| Non-fishing Activity             | 2018-01-06 07:00 | 2018-01-08 09:30 |          |               |           |
| At Fishing Harbor (Fish Landing) | 2018-01-08 09:30 | 2018-01-12 15:11 | 130      | 12            | 25        |

**Table S4.** Speed profiles for different fishing activities

| Fishing ship type | Fishing activity speed |
|-------------------|------------------------|
| Purse Seine       | 1~4 knots              |
| Longline          | 1~3 knots              |
| Gillnet           | 1~4 knots              |
| Squid Jigging     | 0~2 knots              |
| Trawl fishing     | 3~4 knots              |
